# Supplementary material for: TheC. elegansTailless/TLX transcription factornhr-67controls neuronal identity and left/right asymmetric fate diversification
Source: Oxford University Press journal article supplement (doi:10.1242/dev.040204), 2009-07-30
Supplement: dev040204supptable.pdf [file dev040204supptable.pdf]

**Table S1. Expression of non-ASE fate markers in *lisy-9***

| Cell             | <i>gfp</i>    | Genotype                              | 2 cells (wild type)      | 1 cell            | 0 cells | <i>n</i> |
|------------------|---------------|---------------------------------------|--------------------------|-------------------|---------|----------|
| ASJ              | <i>gpa-9</i>  | Wild type                             | 100%                     | 0%                | 0%      | 20       |
|                  |               | <i>ot85</i>                           | 85.3%                    | 14.7%             | 0%      | 34       |
|                  |               | <i>ok631</i>                          | 15%                      | 11%               | 74%     | 27       |
| AUA              | <i>flp-8</i>  | Wild type                             | 100%                     | 0%                | 0%      | 20       |
|                  |               | <i>ot85</i>                           | 76.9%                    | 20.5%             | 2.6%    | 39       |
|                  |               | <i>ok631</i>                          | 50%                      | 25%               | 25%     | 20       |
| AFD              | <i>gcy-8</i>  | Wild type                             | 100%                     | 0%                | 0%      | 25       |
|                  |               | <i>ot85</i>                           | 100%                     | 0%                | 0%      | 44       |
|                  |               | <i>ok631</i>                          | n/a                      | n/a               | n/a     | n/a      |
| AWB              | <i>str-1</i>  | Wild type                             | 100%                     | 0%                | 0%      | 25       |
|                  |               | <i>ot85</i>                           | 78%                      | 22%               | 0%      | 50       |
|                  |               | <i>ok631</i>                          | 43.8%                    | 47.5%             | 8.7%    | 80       |
| ASK              | <i>lim-4</i>  | Wild type                             | 100%                     | 0%                | 0%      | 30       |
|                  |               | <i>ok631</i>                          | 70%                      | 20%               | 10%     | 30       |
|                  |               | Wild type                             | 100%                     | 0%                | 0%      | 25       |
| ADL              | <i>srb-6</i>  | Wild type                             | 100%                     | 0%                | 0%      | 25       |
|                  |               | <i>ot85</i>                           | 87.8%                    | 6.1%              | 6.1%    | 49       |
|                  |               | <i>ok631</i>                          | 87.0%                    | 13.0%             | 0%      | 54       |
| ADF              | <i>srb-6</i>  | Wild type                             | 100%                     | 0%                | 0%      | 25       |
|                  |               | <i>ot85</i>                           | 40.8%                    | 44.9%             | 14.3%   | 49       |
|                  |               | <i>ok631</i>                          | 57.4%                    | 25.9%             | 16.7%   | 54       |
| ADL              | <i>tph-1</i>  | Wild type                             | 100%                     | 0%                | 0%      | 30       |
|                  |               | <i>ok631</i>                          | 7.3%                     | 72.7%             | 20%     | 55       |
|                  |               | <i>ok631; lim-4 (yz12); otEx3103*</i> | 7.4%                     | 40.7%             | 51.9%   | 54       |
| ASH              | <i>srb-6</i>  | <i>ok631; lim-4 (yz12)</i>            | 3.3%                     | 15.6%             | 81.1%   | 90       |
|                  |               | Wild type                             | 100%                     | 0%                | 0%      | 25       |
|                  |               | <i>ot85</i>                           | 81.6%                    | 18.4%             | 0%      | 49       |
| AVG <sup>†</sup> | <i>inx-18</i> | <i>ok631</i>                          | 64.8%                    | 24.1%             | 11.1%   | 54       |
|                  |               | Wild type                             | n/a                      | 100%              | 0%      | 40       |
|                  |               | <i>ok631</i>                          | n/a                      | 6%                | 94%     | 36       |
| AWC              | <i>str-2</i>  | Wild type                             | n/a                      | 98.2%             | 1.8%    | 56       |
|                  |               | <i>ok631</i>                          | n/a                      | 59.1%             | 40.9%   | 88       |
| ASI              | <i>sra-6</i>  | Wild type                             | 100%                     | 0%                | 0%      | 20       |
|                  |               | <i>ok631</i>                          | 100%                     | 0%                | 0%      | 21       |
| PVQ              | <i>sra-6</i>  | Wild type                             | 100%                     | 0%                | 0%      | 20       |
|                  |               | <i>ok631</i>                          | 100%                     | 0%                | 0%      | 21       |
| AIY              | <i>ttx-3</i>  | Wild type                             | 100%                     | 0%                | 0%      | 50       |
|                  |               | <i>ok631</i>                          | 100%                     | 0%                | 0%      | 28       |
| OLL              | <i>ser-2</i>  | Wild type                             | 100%                     | 0%                | 0%      | 30       |
|                  |               | <i>ok631</i>                          | 100%                     | 0%                | 0%      | 30       |
| RME (D/V/L/R)    | <i>unc-47</i> | Wild type                             | 100% (4 cells)           | 0%                | 0%      | 30       |
|                  |               | <i>ok631</i>                          | 9.1%                     | 72.7% (1-3 cells) | 18.2%   | 44       |
| AVL <sup>†</sup> | <i>unc-47</i> | Wild type                             | n/a                      | 100%              | 0%      | 30       |
|                  |               | <i>ok631</i>                          | n/a                      | 46.7%             | 53.3%   | 44       |
| RIS <sup>†</sup> | <i>unc-47</i> | Wild type                             | n/a                      | 100%              | 0%      | 30       |
|                  |               | <i>ok631</i>                          | n/a                      | 36.4%             | 63.6%   | 44       |
| D motor neurons  | <i>unc-47</i> | Wild type                             | 100% (6 cells)           | 0%                | 0%      | 30       |
|                  |               | <i>ok631</i>                          | 100% (6 cells)           | 0%                | 0%      | 44       |
| CEPD, CEPV, ADE  | <i>dat-1</i>  | Wild type                             | 100% (6 cells=wild type) | 0%                | 0%      | 25       |
|                  |               | <i>ok631</i>                          | 100% (6 cells=wild type) | 0%                | 0%      | 31       |

Red text indicates defects; blue, no defects observed.

\**nhr-67(ok631)* is rescued by the presence of the *otEx3103*, *nhr-67*-containing fosmid.

<sup>†</sup>These cells are unilateral, rendering the first scoring category irrelevant.

n/a, not applicable.
